# Supplementary material
Source: PubMed Central journal article supplement (PMC5901756)
Supplement: NIHMS952214-supplement-Supplemental_Material.pdf [file NIHMS952214-supplement-Supplemental_Material.pdf]

# **SUPPLEMENTAL MATERIAL**

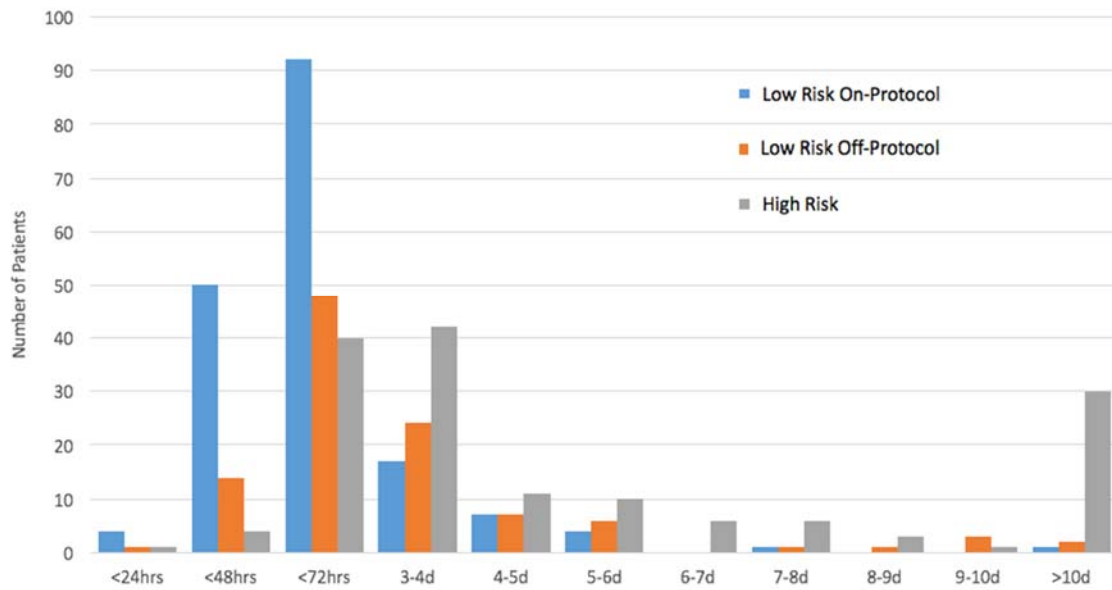

Supplemental Figure 1: Count of patients by length of stay for low risk on-protocol, low risk off-protocol, and high risk STEMI patients in the prospective cohort.

|                                                                 | Low-Risk              |                           |         |
|-----------------------------------------------------------------|-----------------------|---------------------------|---------|
|                                                                 | Pre-Protocol<br>n=540 | Post-On Protocol<br>n=177 | P-value |
| Triaged to Telemetry                                            | 0 (0%)                | 177 (100%)                | <0.001  |
| Age (Years), mean(SD)                                           | 57.2 ± 12.8           | 61.4 ± 12.4               | <0.001  |
| Males, (%)                                                      | 398 (73.8)            | 133 (75.1)                | 0.77    |
| Hypertension, (%)                                               | 308 (57.1)            | 90 (50.9)                 | 0.15    |
| Dyslipidemia, (%)                                               | 298 (55.8)            | 100 (56.8)                | 0.76    |
| Diabetes, (%)                                                   | 97 (18.0)             | 29 (16.4)                 | 0.63    |
| History of Smoking, (%)                                         | 329 (61.0)            | 121 (68.8)                | 0.08    |
| Current Smoker, (%)                                             | 221 (67.2)            | 68 (38.6)                 | 0.55    |
| History of CAD, (%)                                             | 152 (28.2)            | 46 (26.0)                 | 0.58    |
| Previous PCI, (%)                                               | 103 (19.1)            | 39 (22.2)                 | 0.39    |
| Previous MI, (%)                                                | 102 (18.9)            | 35 (19.9)                 | 0.79    |
| Previous CABG, (%)                                              | 27 (5.0)              | 7 (4.0)                   | 0.57    |
| Cardiac Arrest, (%)                                             | 27 (5.0)              | -----                     | -----   |
| Cardiogenic Shock, (%)                                          | 2 (0.4)               | -----                     | -----   |
| Killip Class                                                    |                       |                           |         |
| 0-1, (%)                                                        | 538 (100)             | -----                     | -----   |
| 2-4, (%)                                                        | 0 (0)                 |                           |         |
| Ejection Fraction, mean(SD)                                     | 50.7 ± 12.7           | 55.6 ± 9.7                | <0.001  |
| LOS, median (25 <sup>th</sup> , 75 <sup>th</sup><br>percentile) | 2 (2, 4)              | 2 (1, 2)                  | <0.001  |
| LOS, mean (SD)                                                  | 3.5 (4.4)             | 2.1 (2.5)                 | <0.001  |
| In-Hospital Death, (%)                                          | 0 (0)                 | 0 (0)                     | 1.0     |
| 30 Day Outcomes                                                 |                       |                           |         |
| MI, (%)                                                         | 3 (0.6)               | 0 (0)                     | 0.58    |
| Stroke, (%)                                                     | 1 (0.2)               | 1 (0.6)                   | 0.43    |
| Death, (%)                                                      | 1 (0.2)               | 1 (0.6)                   | 0.43    |
| MACE, (%)                                                       | 5 (0.9)               | 2 (1.1)                   | 1.0     |
| 1 Year Outcomes                                                 |                       |                           |         |
| MI, (%)                                                         | 4 (0.7)               | 2 (1.1)                   | 0.64    |
| Stroke, (%)                                                     | 2 (0.4)               | 1 (0.6)                   | 1.0     |
| Death, (%)                                                      | 21 (3.9)              | 4 (2.3)                   | 0.31    |
| MACE, (%)                                                       | 27 (5.0)              | 7 (4.0)                   | 0.69    |
| Median Total Variable Costs                                     | \$13,648              | \$6,090                   | <0.001  |

Supplemental Table 1: Pre-procedure clinical characteristics, post-procedure ejection fraction, length of stay, complications, mortality and median total variable costs for retrospectively studied low-risk (n=540) vs. prospectively studied on protocol low-risk (n=177) STEMI patients.
